# Supplementary material for: Circulating Vitamin E Levels and Risk of Coronary Artery Disease and Myocardial Infarction: A Mendelian Randomization Study
Source: PubMed Central journal article supplement (PMC6770080; doi:10.3390/nu11092153), 2019-09-09
Supplement: nutrients-11-02153-s001.pdf [file nutrients-11-02153-s001.pdf]

**Table S1.** Related traits of three SNPs from Ensembl search.

| SNP        | Chromosome | Nearby Gene        | Effect Allele | Other Allele | Related Traits                                                                                                                                                                                                                                                                                                                                                                                                                                |
|------------|------------|--------------------|---------------|--------------|-----------------------------------------------------------------------------------------------------------------------------------------------------------------------------------------------------------------------------------------------------------------------------------------------------------------------------------------------------------------------------------------------------------------------------------------------|
| rs11057830 | 12         | SCARB1             | A             | G            | <ol style="list-style-type: none"> <li>1. Vitamin E levels</li> <li>2. Lipoprotein phospholipase A2 activity in cardiovascular disease</li> <li>3. coronary artery disease</li> </ol>                                                                                                                                                                                                                                                         |
| rs2108622  | 19         | CYP4F2             | T             | C            | <ol style="list-style-type: none"> <li>1. Vitamin E levels</li> <li>2. Acenocoumarol maintenance dosage</li> <li>3. Warfarin maintenance dose</li> <li>4. Circulating phylloquinone levels</li> </ol>                                                                                                                                                                                                                                         |
| rs964184   | 11         | BUD13/ZNF259/APOA5 | G             | C            | <ol style="list-style-type: none"> <li>1. Vitamin E levels</li> <li>2. LDL cholesterol</li> <li>3. HDL cholesterol</li> <li>4. Hypertriglyceridemia</li> <li>5. Cholesterol, total</li> <li>6. Triglyceride levels</li> <li>7. Blood protein levels</li> <li>8. Very long-chain saturated fatty acid levels (fatty acid 20:0)</li> <li>9. Very low-density lipoprotein cholesterol levels</li> <li>10. Red cell distribution width</li> </ol> |

Web of Ensembl (Homo sapiens-phenotype): [http://grch37.ensembl.org/Homo\\_sapiens/Info/Index](http://grch37.ensembl.org/Homo_sapiens/Info/Index).

**Table S2.** Associations of three SNPs with CAD/MI and their risk factors.

| SNP        | Effect Allele | Other Allele | CAD   |      | MI   |      | T2D   |      | HDL-C, SD |       | LDL-C, SD |       | TC, SD |       | TG, SD |       | FG, mmol/L |       |
|------------|---------------|--------------|-------|------|------|------|-------|------|-----------|-------|-----------|-------|--------|-------|--------|-------|------------|-------|
|            |               |              | beta  | se   | beta | se   | beta  | se   | beta      | se    | beta      | se    | beta   | se    | beta   | se    | beta       | se    |
| rs11057830 | A             | G            | 0.046 | 0.01 | 0.03 | 0.01 | -0.01 | 0.03 | -0.018    | 0.005 | 0.025     | 0.006 | 0.022  | 0.005 | 0.022  | 0.005 | 0.005      | 0.006 |
| rs2108622  | T             | C            | 0.046 | 0.01 | 0.05 | 0.01 | -0.02 | 0.02 | 0.003     | 0.004 | 0.004     | 0.004 | 0.005  | 0.004 | 0.003  | 0.004 | -0.001     | 0.004 |
| rs964184   | G             | C            | 0.050 | 0.01 | 0.05 | 0.01 | 0.04  | 0.02 | -0.107    | 0.007 | 0.086     | 0.008 | 0.121  | 0.008 | 0.234  | 0.007 | 0.008      | 0.005 |

SNPs, single-nucleotide polymorphisms; SD, standard deviation; SE, standard error; CAD, coronary artery disease; MI, myocardial infarction; T2D, type 2 diabetes; HDL-C, high density lipoprotein cholesterol; LDL-C, low density lipoprotein cholesterol; TC, total cholesterol; TG, triglycerides; FG, fasting glucose.
